# Supplementary figures and images for: La2MnTiO6 double perovskite nanostructures as highly efficient visible light photocatalysts
Source: Royal Society of Chemistry journal article supplement (doi:10.1039/c9nj04932k), 2019-12-05

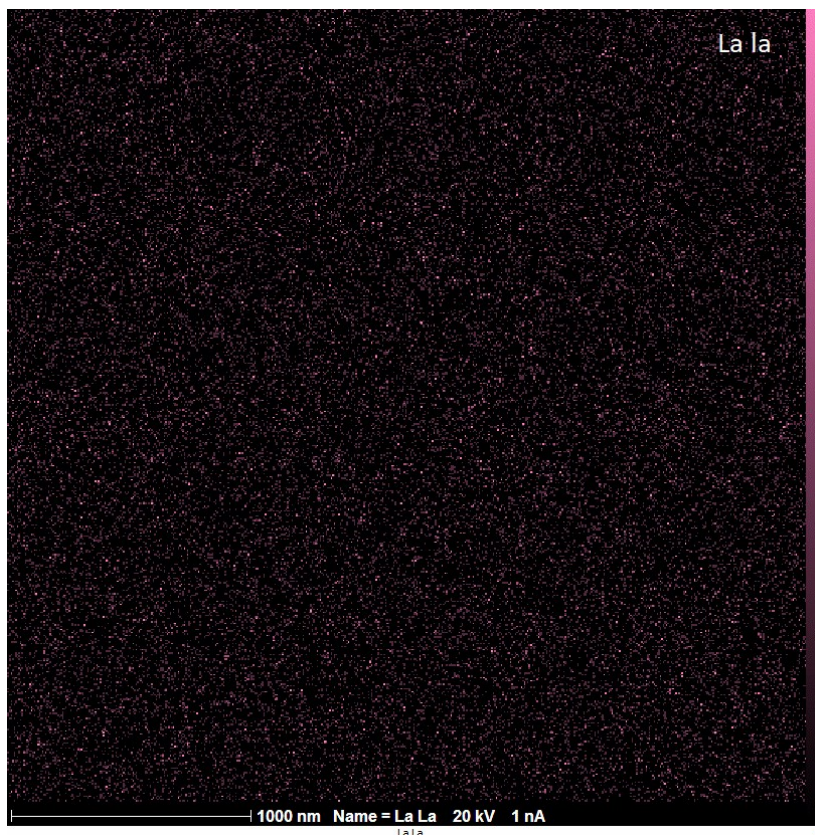

Fig. S1

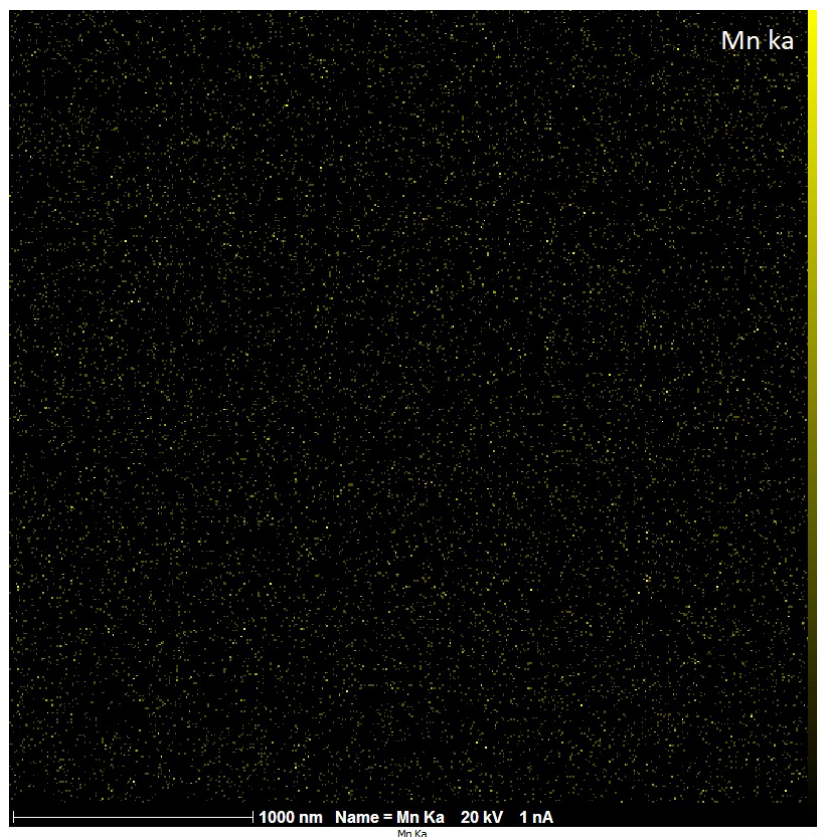

Fig. S2

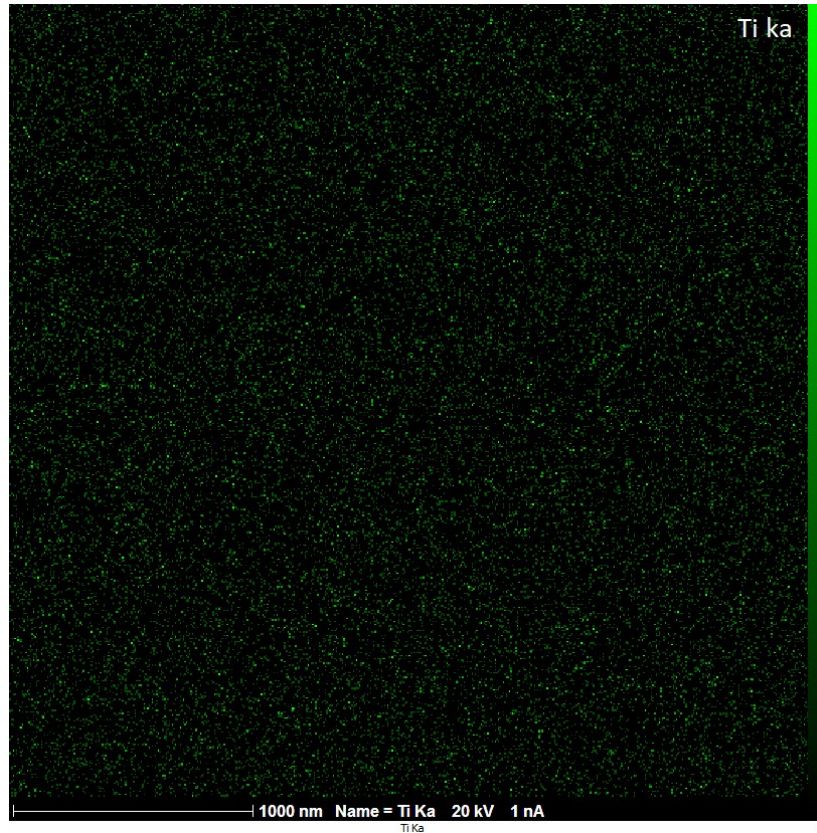

Fig. S3

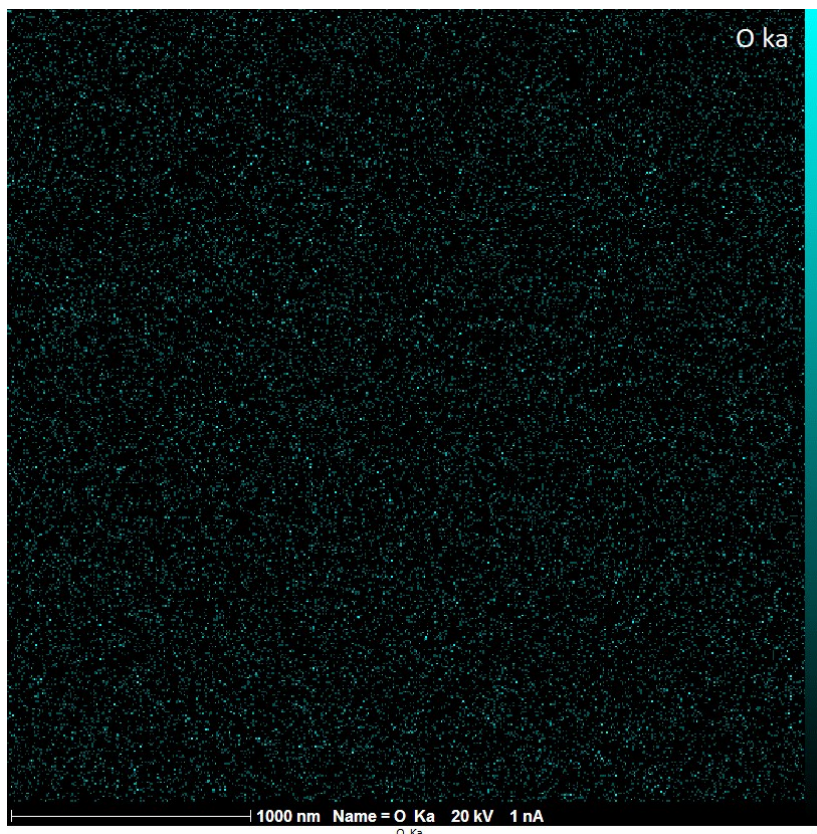

Fig. S4

Supplement: c9nj04932k1.pdf [file c9nj04932k1.pdf]
